# Supplementary material
Source: ML conference proceedings conference paper supplement (https://openreview.net/forum?id=rIHx6puY5b)
Supplement: supplementary_material [file attachment]

## 779 **M Availability**

780 Our entire dataset, including Croissant metadata record and our trained model checkpoints,  
781 are currently available on HuggingFace. All shifts are made available in WebDataset  
782 or HuggingFace Datasets format. The links can be accessed at our GitHub repository,  
783 <https://github.com/jimmyxu123/SELECT>. Our hosting and maintenance plan is to preserve the  
784 work via the HuggingFace repository, which has proven to be a reliable exchange for large datasets in  
785 recent years.

## 786 **N Not safe for work (NSFW) filtering**

787 The images included in ImageNet++ are sourced from the LAION-5B dataset ([36]), the OpenImages  
788 dataset ([25]), and synthetic img2img inversion transformations from the ImageNet-1k dataset.  
789 Although these datasets are generally regarded as safe and publicly available, we employ a variety of  
790 NSFW content filtering techniques to identify and exclude any potentially problematic images and  
791 captions.  
792

793 Firstly, we filter captions using Detoxify ([17]), a robust language model designed to detect toxic  
794 comments. Specifically, we employ the multilingual XLM-roBERTa ([9]) variant. This model  
795 generates scores ranging from zero to one for the following categories: toxicity, severe toxicity,  
796 obscenity, identity attack, insult, threat, and sexually explicit content. Based on the prior work in  
797 image filtering by DataComp ([14]), we heuristically set a threshold of 0.1. This threshold effectively  
798 filters NSFW text while minimizing false positives. If any of the Detoxify category scores exceed this  
799 threshold, the sample is discarded. Next, we apply a filtering process to the visual data. We utilize  
800 a modified version of LAION-5B’s CLIP-based binary NSFW classification model by [36], which  
801 employs CLIP ViT-L/14 visual embeddings as input. Further information about the training data  
802 is provided in Appendix C.5 of the LAION-5B paper. In summary, the dataset comprises 682,000  
803 images, with a roughly equal distribution between Safe for Work (SFW) and NSFW categories.

804 After applying this filtering to the three subsets of ImageNet++, no toxic images were found, indicating  
805 that the dataset’s captions are safe. However, after applying this filtering to the three subsets of  
806 ImageNet++, no toxic images were found, indicating that the dataset’s captions are safe. This result  
807 isn’t surprising given that the source data has been previously vetted by machine or human experts.

## 808 **O Datasheet**

### 809 **Motivation**

#### 810 **For what purpose was the dataset created?**

811 ImageNet++ aims to facilitate the training of models robust against natural distribution shifts,  
812 efficiently utilizing data. Including three datasets, OI1000, Laion-1k, and SD1000, each introducing  
813 natural distribution shifts relative to ImageNet-1k, it is the largest and most diverse superset of  
814 ImageNet-1k. Moreover, we use ImageNet++ to derive novel insights into scaling factors in this paper.  
815

#### 816 **Who created the dataset (e.g., which team, research group) and on behalf of which entity (e.g., 817 company, institution, organization)?**

818 The dataset was created by researchers in the DICE Lab at New York University.  
819

#### 820 **Has the dataset been used already? If so, where are the results so others can compare (e.g., 821 links to published papers)?**

822 The dataset was used for experiments in this paper.  
823

824 **What (other) tasks could the dataset be used for?**

825 The dataset could also be used for model pretraining. The method could also be applied to generate  
826 the same-size shifts to other datasets.

827

828 **Any other comments?** None.

829

### 830 **Dataset Composition**

831 **What do the instances that comprise the dataset represent?**

832 ImageNet++ consists of 5 distinct datasets, each representing a variation of the ImageNet-1k dataset:

833 1. OpenImages-1000(OI1000): A subset of the Open Image dataset[25], where samples are aligned  
834 with ImageNet-1k class names based on human-labeled annotations.

835 2. Laion-1000(LAION1000): A subset of the unlabeled LAION dataset[36], selected through nearest  
836 neighbors search against the ImageNet-1k training set.

837 3. Stable Diffusion-1000(SD1000): A set generated from the ImageNet-1k dataset using Stable  
838 Diffusion, where images are transformed via an inversion process.

839

840 **How many instances are there in total?**

841 See Table 6 for reference of our dataset.

842

843 **What data does each instance consist of? “Raw” data (e.g., unprocessed text or images)?**

844 **Features/attributes? Is there a label/target associated with instances?**

845 Instances in OI1000 and LAION1000 are images each associated with labels and captions. SD1000  
846 contains AI-generated features based on the images from ImageNet-1k, also with associated labels.

847 All the included data are filtered for NSFW content (see Appendix N)

848

849 **Is any information missing from individual instances? If so, please provide a description,**

850 **explaining why this information is missing (e.g., because it was unavailable). This does not**

851 **include intentionally removed information but might include, e.g., redacted text.** There is no

852 missing information in the dataset.

853

854 **Does the dataset contain all possible instances or is it a sample (not necessarily random) of**

855 **instances from a larger set? If the dataset is a sample, then what is the larger set? Is the sample**

856 **representative of the larger set (e.g., geographic coverage)? If so, please describe how this**

857 **representativeness was validated/verified. If it is not representative of the larger set, please**

858 **describe why not (e.g., to cover a more diverse range of instances, because instances were**

859 **withheld or unavailable).**

860 Instances in OI1000 and LAION1000 are raw images, while SD1000 comprises AI-generated features

861 derived from ImageNet-1k images. All instances are labeled. The datasets, particularly OI1000 and

862 LAION1000, are subsets of larger sets and are intentionally curated to introduce specific feature shifts

863 relative to ImageNet-1k, rather than to serve as comprehensive representations of their parent datasets.

864

865 **Are there any errors, sources of noise, or redundancies in the dataset? If so, please provide a**

866 **description.**

867 There are no known errors, noise, or redundancies in the dataset.

868

869 **Any other comments?**

870 None.

871 **Collection Process**

872 **What mechanisms or procedures were used to collect the data? (e.g., hardware apparatuses or**  
873 **sensors, manual human curation, software programs, software APIs)**

874 All the data of OI1000 and Laion-1k are collected from larger public sets. Data in SD1000 is  
875 generated by AI.

876

877 **If the dataset is a sample from a larger set, what was the sampling strategy (e.g., deterministic,**  
878 **probabilistic with specific sampling probabilities)?**

879 1.OI1000 (OpenImages-1000): The sampling strategy was deterministic, based on a direct mapping  
880 of human-labeled class names to the corresponding classes in ImageNet-1k.

881 2.LAION1000: The sampling was semi-probabilistic. Samples were selected using a nearest  
882 neighbors search based on the ImageNet-1k training set. While this approach is guided by the  
883 proximity of LAION images to the ImageNet-1k feature space, it inherently introduces a probabilistic  
884 element due to the variability in nearest-neighbor results.

885 3.SD1000 (Stable Diffusion-1000): This subset encompasses all possible instances generated from  
886 the ImageNet-1k dataset using Stable Diffusion, hence it's not a sample but a complete set derived  
887 from the original dataset through a generative process.

888

889 **Who was involved in the data collection process (e.g., students, crowd workers, contractors),**  
890 **and how were they compensated (e.g., how much were crowd workers paid)?**

891 The creation of ImageNet++ is done by the author of this work.

892

893 **Over what timeframe was the data collected?**

894 The timeframe for creating the ImageNet++ is from 12/2023 to 1/2024.

895

896 **Any other comments?** None.

897

898 **Data Preprocessing**

899 **Was any preprocessing/cleaning/labeling of the data done (e.g., discretization or bucketing,**  
900 **tokenization, part-of-speech tagging, SIFT feature extraction, removal of instances, processing**  
901 **of missing values)? If so, please provide a description. If not, you may skip the remainder of**  
902 **the questions in this section.**

903 As our images are collected either from public data sources or synthetic generation, we did an NSFW  
904 filtering on all the images and the captions (see Appendix N).

905

906 **Was the "raw" data saved in addition to the preprocessed/cleaned/labeled data (e.g., to support**  
907 **unanticipated future uses)? If so, please provide a link or other access point to the "raw" data.**

908 Yes, the "raw data" was also public.

909

910 **Is the software used to preprocess/clean/label the instances available? If so, please provide a**  
911 **link or other access point.**

912 The details can be found in Appendix N.

913

914 **Does this dataset collection/processing procedure achieve the motivation for creating the**  
915 **dataset stated in the first section of this datasheet? If not, what are the limitations?**

916 We hope that the release of this benchmark suite will achieve our goal of accelerating research in  
917 models' robustness to natural shifts, as well as making it easier for researchers and practitioners to

918 generate data augmentations via our benchmark.

919

920 **Any other comments?** None.

921

## 922 **Dataset Distribution**

923 **Will the dataset be distributed to third parties outside of the entity (e.g., company, institution, organization) on behalf of which the dataset was created?**

924 The dataset will be public soon. All researchers and practitioners can access it if they are interested  
925 in the dataset.

926

927 **How will the dataset be distributed (e.g., tarball on website, API, GitHub)?**

928 We will publish all the format of the data.

929

930 **When will the dataset be released/first distributed? What license (if any) is it distributed under?**

931 The dataset is public as of 6/2024.

932

933 **Are there any copyrights on the data?**

934 There are no copyrights on the data.

935

936 **Are there any fees or access/export restrictions?**

937 There are no fees or restrictions.

938

939 **Any other comments?**

940 None.

941

## 942 **Dataset Maintenance**

943 **Who is supporting/hosting/maintaining the dataset?**

944 The authors of this work are supporting/hosting/maintaining the dataset.

945

946 **Will the dataset be updated? If so, how often and by whom?** We welcome updates from the  
947 community.

948

949 **How will updates be communicated? (e.g., mailing list, GitHub)**

950 Updates will be communicated by the mailing list of the authors.

951

952 **If the dataset becomes obsolete how will this be communicated?**

953 If the dataset becomes obsolete, it can be communicated by the mailing list of the authors.

954

955 **If others want to extend/augment/build on this dataset, is there a mechanism for them to do so?  
956 If so, is there a process for tracking/assessing the quality of those contributions? What is the  
957 process for communicating/distributing these contributions to users?**

958 Others can publish their extends/augmentation on the benchmark to any open-source website (eg.  
959 HuggingFace, Github, etc.)

960

962 **Any other comments?**

963 None.

964

965 **Legal and Ethical Considerations**

966 **Were any ethical review processes conducted (e.g., by an institutional review board)? If so,**  
967 **please provide a description of these review processes, including the outcomes, as well as a link**  
968 **or other access point to any supporting documentation.**

969 There was no ethical review process. However, we did filtering for NSFW information before  
970 publishing the dataset.

971

972 **Does the dataset contain data that might be considered confidential (e.g., data that is protected**  
973 **by legal privilege or by doctor-patient confidentiality, data that includes the content of**  
974 **individuals non-public communications)? If so, please provide a description.**

975 All the data are either collected from public source or generated by AI. There is no confidential data.

976

977 **Does the dataset contain data that, if viewed directly, might be offensive, insulting, threatening,**  
978 **or might otherwise cause anxiety? If so, please describe why.**

979 We did NSFW filtering to prevent this problem. As we believe, none of the data might be offensive,  
980 insulting, threatening, or otherwise cause anxiety.

981

982 **Any other comments?**

983 None.

984
